# Supplementary material for: Chronic alcohol consumption alters extracellular space geometry and transmitter diffusion in the brain
Source: PubMed Central journal article supplement (PMC7314532; doi:10.1126/sciadv.aba0154), 2020-06-24
Supplement: aba0154_SM.pdf [file aba0154_SM.pdf]

## Supplementary Materials for

### **Chronic alcohol consumption alters extracellular space geometry and transmitter diffusion in the brain**

Silvia De Santis, Alejandro Cosa-Linan, Raquel Garcia-Hernandez, Lesia Dmytrenko, Lydia Vargova, Ivan Vorisek, Serena Stopponi, Patrick Bach, Peter Kirsch, Falk Kiefer, Roberto Ciccocioppo, Eva Sykova, David Moratal, Wolfgang H. Sommer\*, Santiago Canals\*

\*Corresponding author. Email: [wolfgang.sommer@zi-mannheim.de](mailto:wolfgang.sommer@zi-mannheim.de) (W.H.S.); [scanals@umh.es](mailto:scanals@umh.es) (S.C.)

Published 24 June 2020, *Sci. Adv.* **6**, eaba0154 (2020)

DOI: [10.1126/sciadv.aba0154](https://doi.org/10.1126/sciadv.aba0154)

#### **This PDF file includes:**

Figs. S1 to S5  
Tables S1 and S2

## Supplementary Materials

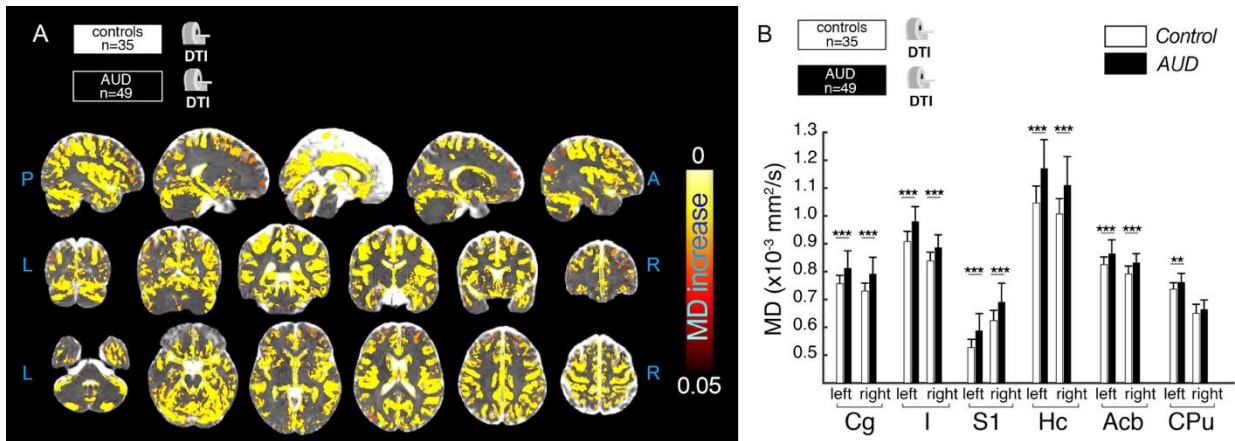

**Figure S1. Effects of alcohol consumption in mean diffusivity for age-matched humans. A.** Voxel-wise statistical analysis showing cross-sectional MD differences between controls (n=35) and a subset of age-matched alcohol-dependent patients at first scan (n=39). **B.** Mean MD values for controls and AUD patients at first scan. Reported statistics show cross-sectional differences between controls and AUD patients.

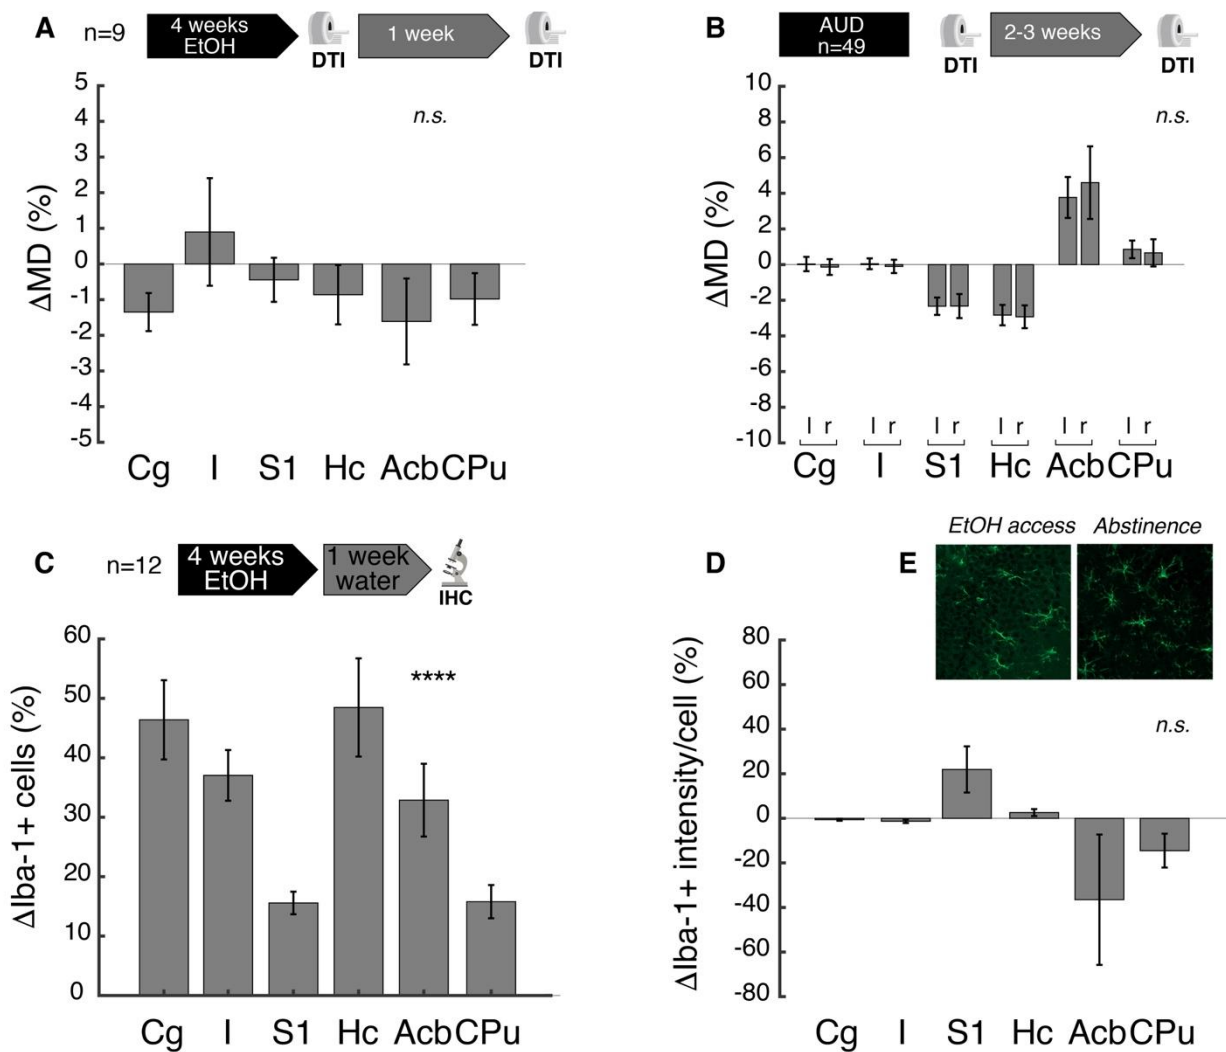

**Figure S2. Effects of abstinence in mean diffusivity and microglia markers.** MRI MD percent change in rats (**A**) and humans (**B**) in abstinence compared to alcohol stage. No differences were found between groups, indicating that MD remains enhanced during early abstinence. **C.** Change in number of Iba1+ cells in abstinence compared to alcohol stage in rats. There is a significant increase in the number of microglial cells in early abstinence ( $F(1, 65)=58.5, p<0.0001$ ). No interaction was found ( $F(5, 65)=2.29, p=0.06$ ). **D.** Same as (C) but for Iba1+ intensity. No statistically significant differences were found ( $F(1, 62)=0.04, p=0.83$ ). **E.** Iba-1+ immunostaining in histological sections from representative animals in the two experimental groups. Images were taken from the hippocampal formation (dentate gyrus).

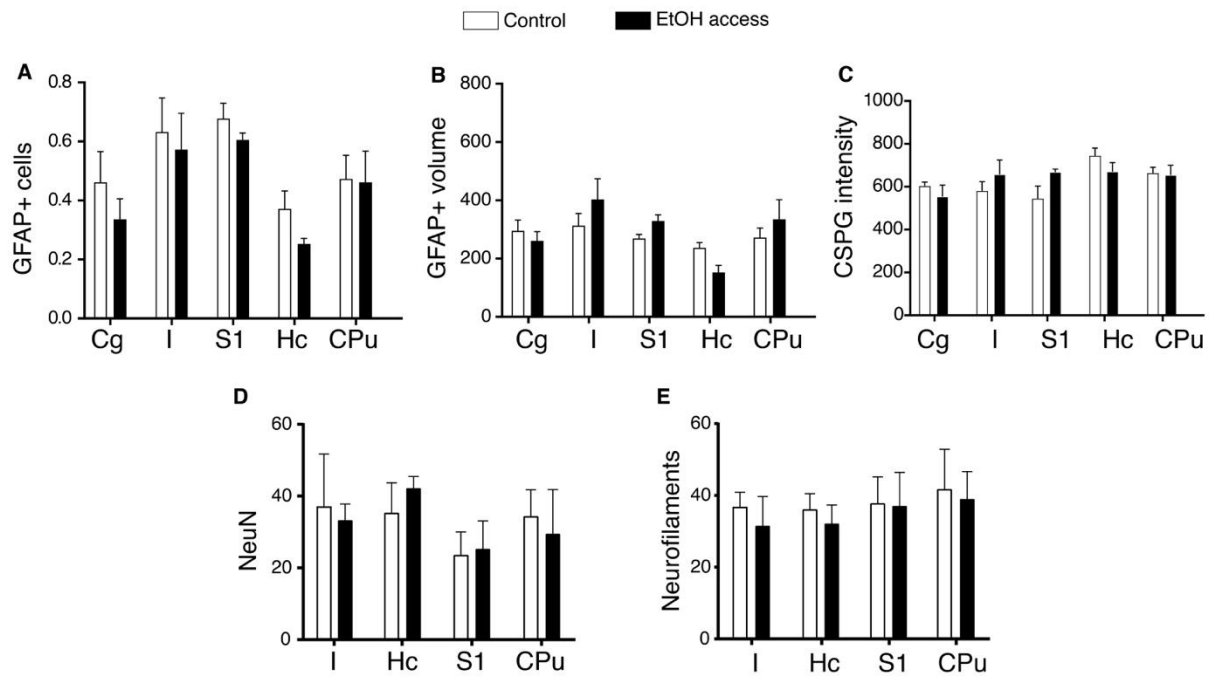

**Figure S3. Astroglial, CSPG and neuronal response to alcohol drinking.** **A.** Astroglial response to alcohol drinking measured as number of GFAP+ cells. **B.** Volume of GFAP+ cells in alcohol versus control animals. **C.** CSPG response to alcohol drinking and abstinence. **D.** NeuN staining in alcohol versus control animals. **E.** Neurofilaments staining in alcohol versus control animals. None of the staining is statistically different between control and exposed animals. *Cg*: Cingulate cortex; *I*: insular cortex; *S1*: primary somatosensory cortex; *Hc*: hippocampus; *CPu*: caudate-putamen.

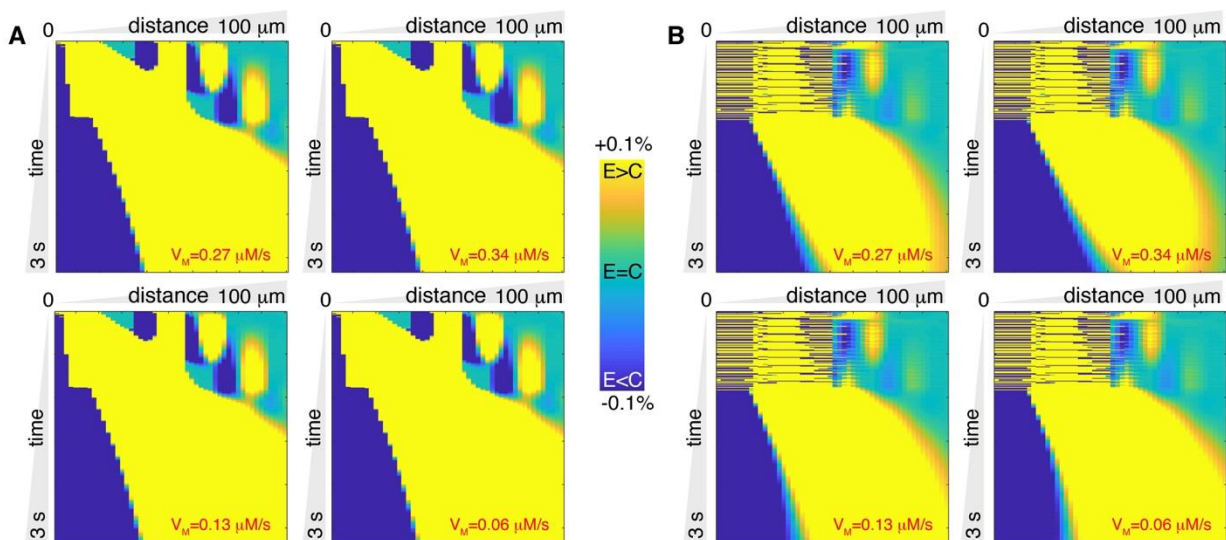

**Figure S4. Dopamine concentration for different velocities.** Difference between dopamine concentrations in EtOH and control conditions in the range 1-100  $\mu\text{m}$  and 0-3 s for tonic (A) and phasic (B) dopamine release patterns. In the four panels, the parameter  $V_M$  is varied to reproduce values found experimentally.

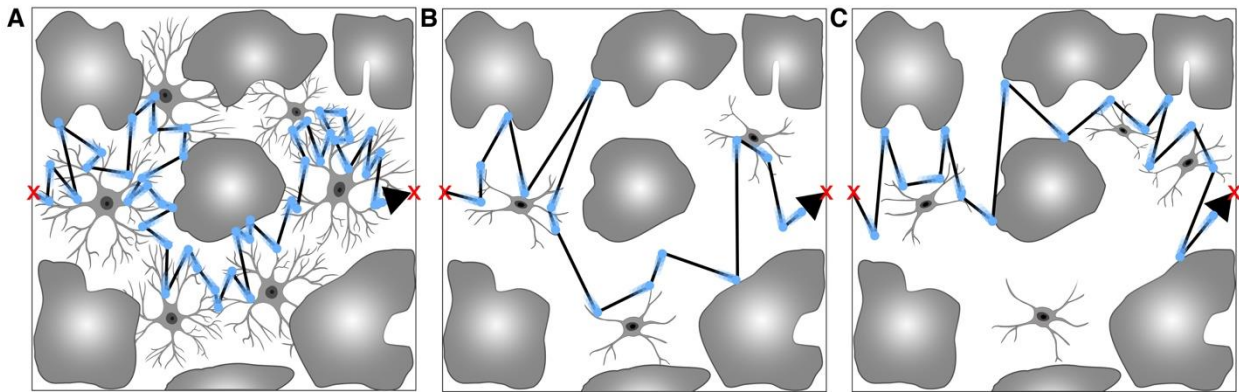

**Figure S5. ECS in alcohol and abstinence.** **A.** Schematic representation of random walk-like diffusion in ECS containing microglia and astrocyte in control condition. **B.** Diffusion in ECS compatible with alcohol condition, characterized by a reduced microglia density and less complex ramifications. **C.** Diffusion in ECS compatible with abstinence condition, where the density of microglia has slightly increased, but the complexity is still lower than controls.

**Table S1.** Effects of alcohol consumption in mean diffusivity (MD) in msP rats (n=18 with EtOH access and n=18 controls).

| ROI | Mean diffusivity (mm <sup>2</sup> /s × 10 <sup>3</sup> ) |       |                     |       |                     |       | Baseline    | 1 month <sup>1</sup>       |                               |
|-----|----------------------------------------------------------|-------|---------------------|-------|---------------------|-------|-------------|----------------------------|-------------------------------|
|     | Interaction<br>Group×Time                                |       | Group<br>effect     |       | Time<br>effect      |       |             |                            |                               |
|     | F <sub>(1,34)</sub>                                      | p     | F <sub>(1,34)</sub> | p     | F <sub>(1,34)</sub> | p     |             |                            |                               |
| Cg  | 21,6                                                     | 0,000 | 35,3                | 0,000 | 1,5                 | 0,219 | Control     | 0,838±0,024                | 0,820±0,024*                  |
|     |                                                          |       |                     |       |                     |       | EtOH access | 0,850±0,017                | 0,879±0,031* <sup>###</sup>   |
| I   | 38,0                                                     | 0,000 | 0,0                 | 0,859 | 38,0                | 0,081 | Control     | 1,150±0,051                | 1,060±0,055***                |
|     |                                                          |       |                     |       |                     |       | EtOH access | 1,081±0,025 <sup>###</sup> | 1,149±0,049* <sup>#</sup>     |
| S1  | 38,0                                                     | 0,000 | 1,4                 | 0,247 | 38,0                | 0,017 | Control     | 0,850±0,015                | 0,899±0,030***                |
|     |                                                          |       |                     |       |                     |       | EtOH access | 0,850±0,020 <sup>##</sup>  | 0,920±0,025*** <sup>##</sup>  |
| Hc  | 38,0                                                     | 0,000 | 0,2                 | 0,699 | 38,                 | 0,103 | Control     | 1,133±0,036                | 1,107±0,031*                  |
|     |                                                          |       |                     |       |                     |       | EtOH access | 1,115±0,023                | 1,162±0,041*** <sup>##</sup>  |
| Acb | 13,9                                                     | 0,001 | 32,2                | 0,000 | 2,7                 | 0,106 | Control     | 1,049±0,032                | 1,028±0,046                   |
|     |                                                          |       |                     |       |                     |       | EtOH access | 1,070±0,048                | 1,121±0,046* <sup>###</sup>   |
| CPu | 38,0                                                     | 0,000 | 0,160               | 0,692 | 38,0                | 0,008 | Control     | 0,899±0,026                | 0,874±0,028*                  |
|     |                                                          |       |                     |       |                     |       | EtOH access | 0,863±0,019 <sup>###</sup> | 0,915±0,030*** <sup>###</sup> |

<sup>1</sup>Significantly different from Baseline \*p<0.05, \*\*p<0.01, \*\*\*p<0.001; significantly different from control #p<0.05, ##p<0.01, ###p<0.001

**Table S2.** Effects of alcohol consumption and abstinence in mean diffusivity (MD) in humans.

| ROI |       | Mean diffusivity (mm <sup>2</sup> /s × 10 <sup>3</sup> ) |        |                     |                             |
|-----|-------|----------------------------------------------------------|--------|---------------------|-----------------------------|
|     |       | F <sub>(1,81)</sub>                                      | P      | Controls<br>Mean±SD | AUD <sup>1</sup><br>Mean±SD |
| Cg1 | left  | 23,5                                                     | <0,001 | 0,758±0,005         | 0,831±0,010***              |
|     | right | 9,0                                                      | 0,004  | 0,731±0,005         | 0,810±0,010**               |
| I   | left  | 29,5                                                     | <0,001 | 0,909±0,006         | 0,995±0,010***              |
|     | right | 28,1                                                     | <0,001 | 0,839±0,005         | 0,704±0,011***              |
| Cpu | left  | 10,8                                                     | 0,001  | 0,738±0,004         | 0,772±0,006**               |
|     | right | 16,7                                                     | <0,001 | 0,651±0,005         | 0,676±0,007***              |
| Hc  | left  | 14,6                                                     | <0,001 | 1,047±0,010         | 1,191±0,016***              |
|     | right | 23,4                                                     | <0,001 | 1,008±0,009         | 1,127±0,015***              |
| Acb | left  | 13,2                                                     | <0,001 | 0,826±0,005         | 0,870±0,007***              |
|     | right | 12,8                                                     | 0,001  | 0,792±0,005         | 0,836±0,005**               |
| S1  | left  | 25,0                                                     | <0,001 | 0,528±0,005         | 0,596±0,009***              |
|     | right | 15,2                                                     | <0,001 | 0,808±0,007         | 0,884±0,010***              |

<sup>1</sup>Significantly different from Control \*p<0.05, \*\*p<0.01, \*\*\*p<0.001 corrected.
